# Supplementary material for: Porcine Epidemic Diarrhea Virus Replication in Duck Intestinal Cell Line
Source: PubMed Central journal article supplement (PMC4344288; doi:10.3201/eid2103.141658), 2015-03
Supplement: 14-1658-Techapp-s1.pdf [file 14-1658-Techapp-s1.pdf]

# Porcine Epidemic Diarrhea Virus Replication in Duck Intestinal Cell Line

## Technical Appendix

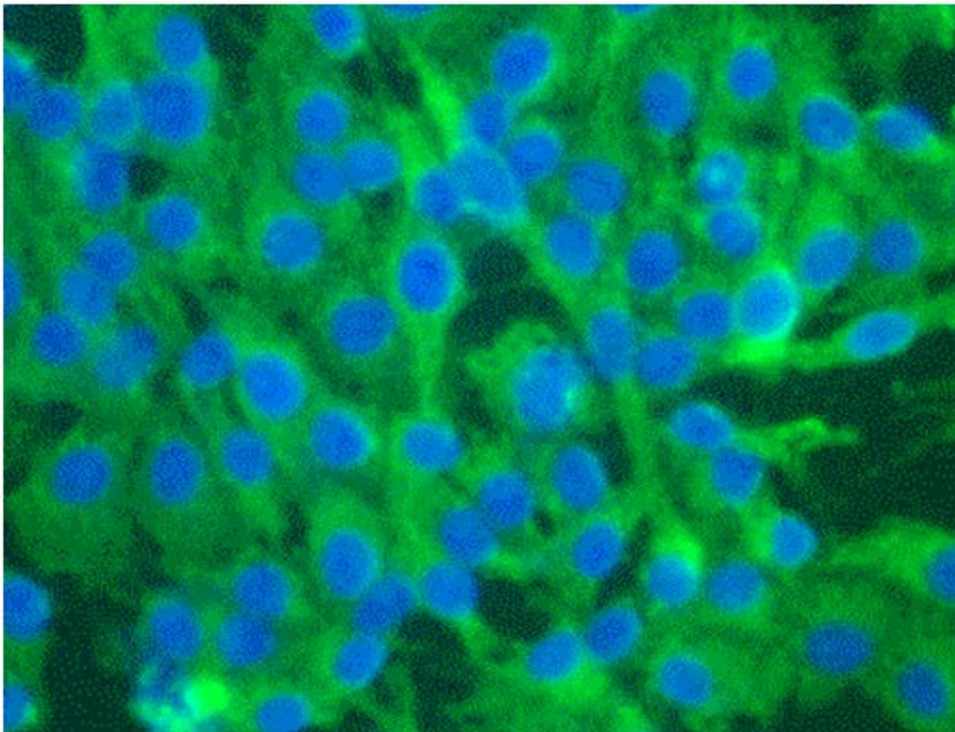

Technical Appendix Figure 1. Expression of aminopeptidase N (APN) on immortalized duck intestinal epithelial cell line (MK-DIEC). APN expression was detected on MK-DIEC cell surfaces by immunofluorescence assay using rabbit polyclonal anti-human APN as primary antibody and fluorescein isothiocyanate–labeled goat anti-rabbit as secondary antibody.

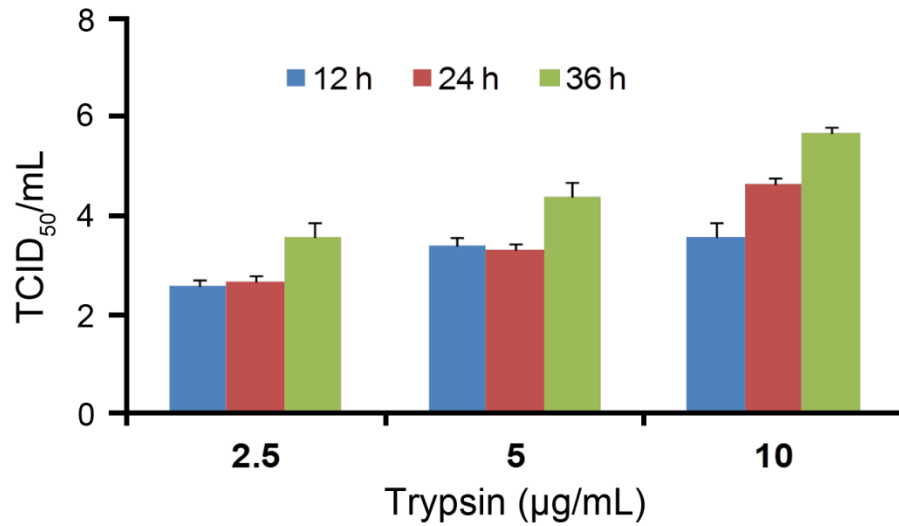

Technical Appendix Figure 2. Quantification of released progeny virus in porcine epidemic diarrhea virus–infected supernatant of immortalized duck intestinal epithelial cell line MK-DIEC cells, as measured by titration in Vero cells. Each bar represents mean ( $\pm$ SD) virus titer at each time point from 3 independent experiments. TCID<sub>50</sub>, 50% tissue culture infectious dose.
